# Supplementary material
Source: publisher site journal article supplement (https://www.kjim.org/upload/media/kjim-2020-195-suppl3.pdf)
Supplement: Supplementary file 1 [file kjim-2020-195-suppl3.pdf]

**Supplementary Table 3. Associations between biopsy-proven diagnosis and clinical outcomes in complete cases of diabetic patients (n = 2,078)**

| Outcomes | B     | HR   | 95% CI for HR | p value |
|----------|-------|------|---------------|---------|
| Death    |       |      |               |         |
| Pure DN  | -0.25 | 0.78 | 0.52-1.15     | 0.21    |
| NDRD/DN  | -0.13 | 0.88 | 0.32-2.41     | 0.81    |
| NDRD     |       |      | Reference     |         |
| ESKD     |       |      |               |         |
| Pure DN  | 0.55  | 1.74 | 1.44-2.10     | < 0.001 |
| NDRD/DN  | 0.01  | 1.01 | 0.58-1.76     | 0.98    |
| NDRD     |       |      | Reference     |         |

HRs were adjusted for age, gender, period of renal biopsy, presence of hypertension, estimated glomerular filtration rate, serum albumin, hemoglobin, urine protein-to-creatinine ratio, systolic blood pressure, and diastolic blood pressure.

B, beta coefficients; HR, hazard ratio; CI, confidence interval; DN, diabetic nephropathy; NDRD, non-diabetic renal disease; ESKD, end-stage kidney disease.
